# Supplementary material for: Polymorphism and properties of ammonium scandium sulfate (NH4)3Sc(SO4)3: new intermediate compound in scandium production
Source: Royal Society of Chemistry journal article supplement (doi:10.1039/c8ce00593a), 2018-01-01
Supplement: c8ce00593a1.pdf [file c8ce00593a1.pdf]

## Supplementary materials

**Table 1SM.** Unit cell parameters and thermal expansion coefficients of the low-temperature modification of  $(\text{NH}_4)_3\text{Sc}(\text{SO}_4)_3$  upon temperature

| T, °C      | a, Å    | b, Å     | c, Å    | $\beta$ , ° | V, Å <sup>3</sup> | V/Z, Å <sup>3</sup> | $\alpha_a, \times 10^{-6} \text{ } ^\circ\text{C}^{-1}$ | $\alpha_b, \times 10^{-6} \text{ } ^\circ\text{C}^{-1}$ | $\alpha_c, \times 10^{-6} \text{ } ^\circ\text{C}^{-1}$ | $\alpha_V, \times 10^{-6} \text{ } ^\circ\text{C}^{-1}$ |
|------------|---------|----------|---------|-------------|-------------------|---------------------|---------------------------------------------------------|---------------------------------------------------------|---------------------------------------------------------|---------------------------------------------------------|
| 25         | 9.0524( | 15.4622( | 9.2165( | 108.43(     | 1223.9(           | 305.97(2)           |                                                         |                                                         |                                                         |                                                         |
| 40         | 9.0608( | 15.4628( | 9.2198( | 108.41(     | 1225.6(           | 306.41(2)           | 61.7                                                    | 2.58                                                    | 23.9                                                    | 94.0                                                    |
| 50         | 9.0683( | 15.4643( | 9.2208( | 108.42(     | 1226.8(           | 306.71(2)           | 82.7                                                    | 9.69                                                    | 10.8                                                    | 98.7                                                    |
| 60         | 9.0748( | 15.4662( | 9.2226( | 108.41(     | 1228.1(           | 307.04(2)           | 71.6                                                    | 12.3                                                    | 19.5                                                    | 10.7                                                    |
| 70         | 9.0814( | 15.4664( | 9.2238( | 108.41(     | 1229.3(           | 307.31(2)           | 72.6                                                    | 1.29                                                    | 13.0                                                    | 89.9                                                    |
| 80         | 9.0878( | 15.4685( | 9.2248( | 108.41(     | 1230.4(           | 307.60(2)           | 70.4                                                    | 13.6                                                    | 10.8                                                    | 91.8                                                    |
| 90         | 9.0918( | 15.4663( | 9.2268( | 108.41(     | 1231.0(           | 307.75(2)           | 44.0                                                    | -14.2                                                   | 21.7                                                    | 51.1                                                    |
| 100        | 9.0922( | 15.4643( | 9.2284( | 108.41(     | 1231.2(           | 307.79(2)           | 4.71                                                    | -12.9                                                   | 17.5                                                    | 11.6                                                    |
| <b>Mea</b> |         |          |         |             |                   |                     | <b>58.2</b>                                             | <b>1.75</b>                                             | <b>16.8</b>                                             | <b>77.7</b>                                             |

$$\alpha_a = \frac{1}{a} \left( \frac{\partial L}{\partial R} \right), \alpha_b = \frac{1}{b} \left( \frac{\partial L}{\partial R} \right), \alpha_c = \frac{1}{c} \left( \frac{\partial L}{\partial R} \right), \alpha_V = \frac{1}{V} \left( \frac{\partial L}{\partial R} \right)$$

**Table 2SM.** Unit cell parameters and thermal expansion coefficients of the high-temperature modification of  $(\text{NH}_4)_3\text{Sc}(\text{SO}_4)_3$  upon temperature

| T, °C       | a, Å       | c, Å      | V, Å <sup>3</sup> | V/Z, Å <sup>3</sup> | $\alpha_a, \times 10^{-6} \text{ } ^\circ\text{C}^{-1}$ | $\alpha_c, \times 10^{-6} \text{ } ^\circ\text{C}^{-1}$ | $\alpha_V, \times 10^{-6} \text{ } ^\circ\text{C}^{-1}$ |
|-------------|------------|-----------|-------------------|---------------------|---------------------------------------------------------|---------------------------------------------------------|---------------------------------------------------------|
| 80          | 15.4278(4) | 9.2190(2) | 1900.3(1)         | 316.72(2)           |                                                         |                                                         |                                                         |
| 90          | 15.4309(4) | 9.2203(2) | 1901.3(1)         | 316.89(2)           | 20.1                                                    | 14.1                                                    | 53.6                                                    |
| 100         | 15.4329(4) | 9.2228(2) | 1902.4(1)         | 317.06(2)           | 13.0                                                    | 27.1                                                    | 53.6                                                    |
| 110         | 15.4350(4) | 9.2251(2) | 1903.3(1)         | 317.22(2)           | 13.6                                                    | 24.9                                                    | 52.0                                                    |
| 120         | 15.4391(4) | 9.2262(2) | 1904.6(1)         | 317.43(2)           | 26.6                                                    | 11.9                                                    | 65.2                                                    |
| 140         | 15.4435(3) | 9.2305(2) | 1906.6(1)         | 317.76(2)           | 14.2                                                    | 23.3                                                    | 51.9                                                    |
| 150         | 15.4457(4) | 9.2327(2) | 1907.5(1)         | 317.92(2)           | 14.2                                                    | 23.8                                                    | 51.4                                                    |
| 160         | 15.4495(4) | 9.2342(2) | 1908.8(1)         | 318.13(2)           | 24.6                                                    | 16.2                                                    | 65.5                                                    |
| 180         | 15.4552(4) | 9.2382(2) | 1911.0(1)         | 318.50(2)           | 18.4                                                    | 21.6                                                    | 58.3                                                    |
| 200         | 15.4618(4) | 9.2410(2) | 1913.3(1)         | 318.88(2)           | 21.3                                                    | 15.1                                                    | 58.3                                                    |
| 220         | 15.4672(4) | 9.2441(2) | 1915.2(1)         | 319.20(2)           | 17.5                                                    | 16.8                                                    | 51.4                                                    |
| 240         | 15.4743(4) | 9.2469(2) | 1917.6(1)         | 319.59(2)           | 22.9                                                    | 15.1                                                    | 61.0                                                    |
| 260         | 15.4801(4) | 9.2491(2) | 1919.5(1)         | 319.91(2)           | 18.7                                                    | 11.9                                                    | 49.2                                                    |
| 280         | 15.4873(4) | 9.2525(2) | 1921.9(1)         | 320.32(2)           | 23.2                                                    | 18.4                                                    | 64.8                                                    |
| <b>Mean</b> |            |           |                   |                     | <b>19.1</b>                                             | <b>18.5</b>                                             | <b>56.6</b>                                             |

$$\alpha_a = \frac{1}{a} \left( \frac{\partial L}{\partial R} \right), \alpha_b = \frac{1}{b} \left( \frac{\partial L}{\partial R} \right), \alpha_c = \frac{1}{c} \left( \frac{\partial L}{\partial R} \right), \alpha_V = \frac{1}{V} \left( \frac{\partial L}{\partial R} \right)$$

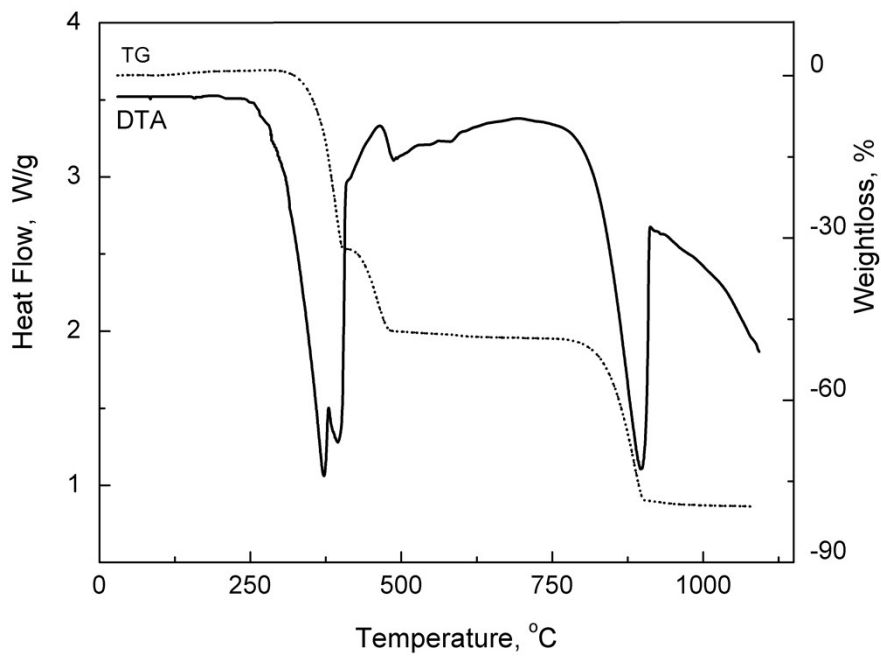

**Fig. 1SM.** TG and DTA curves of  $(\text{NH}_4)_3\text{Sc}(\text{SO}_4)_3$  at a heating rate of  $10^\circ/\text{min}$  in air

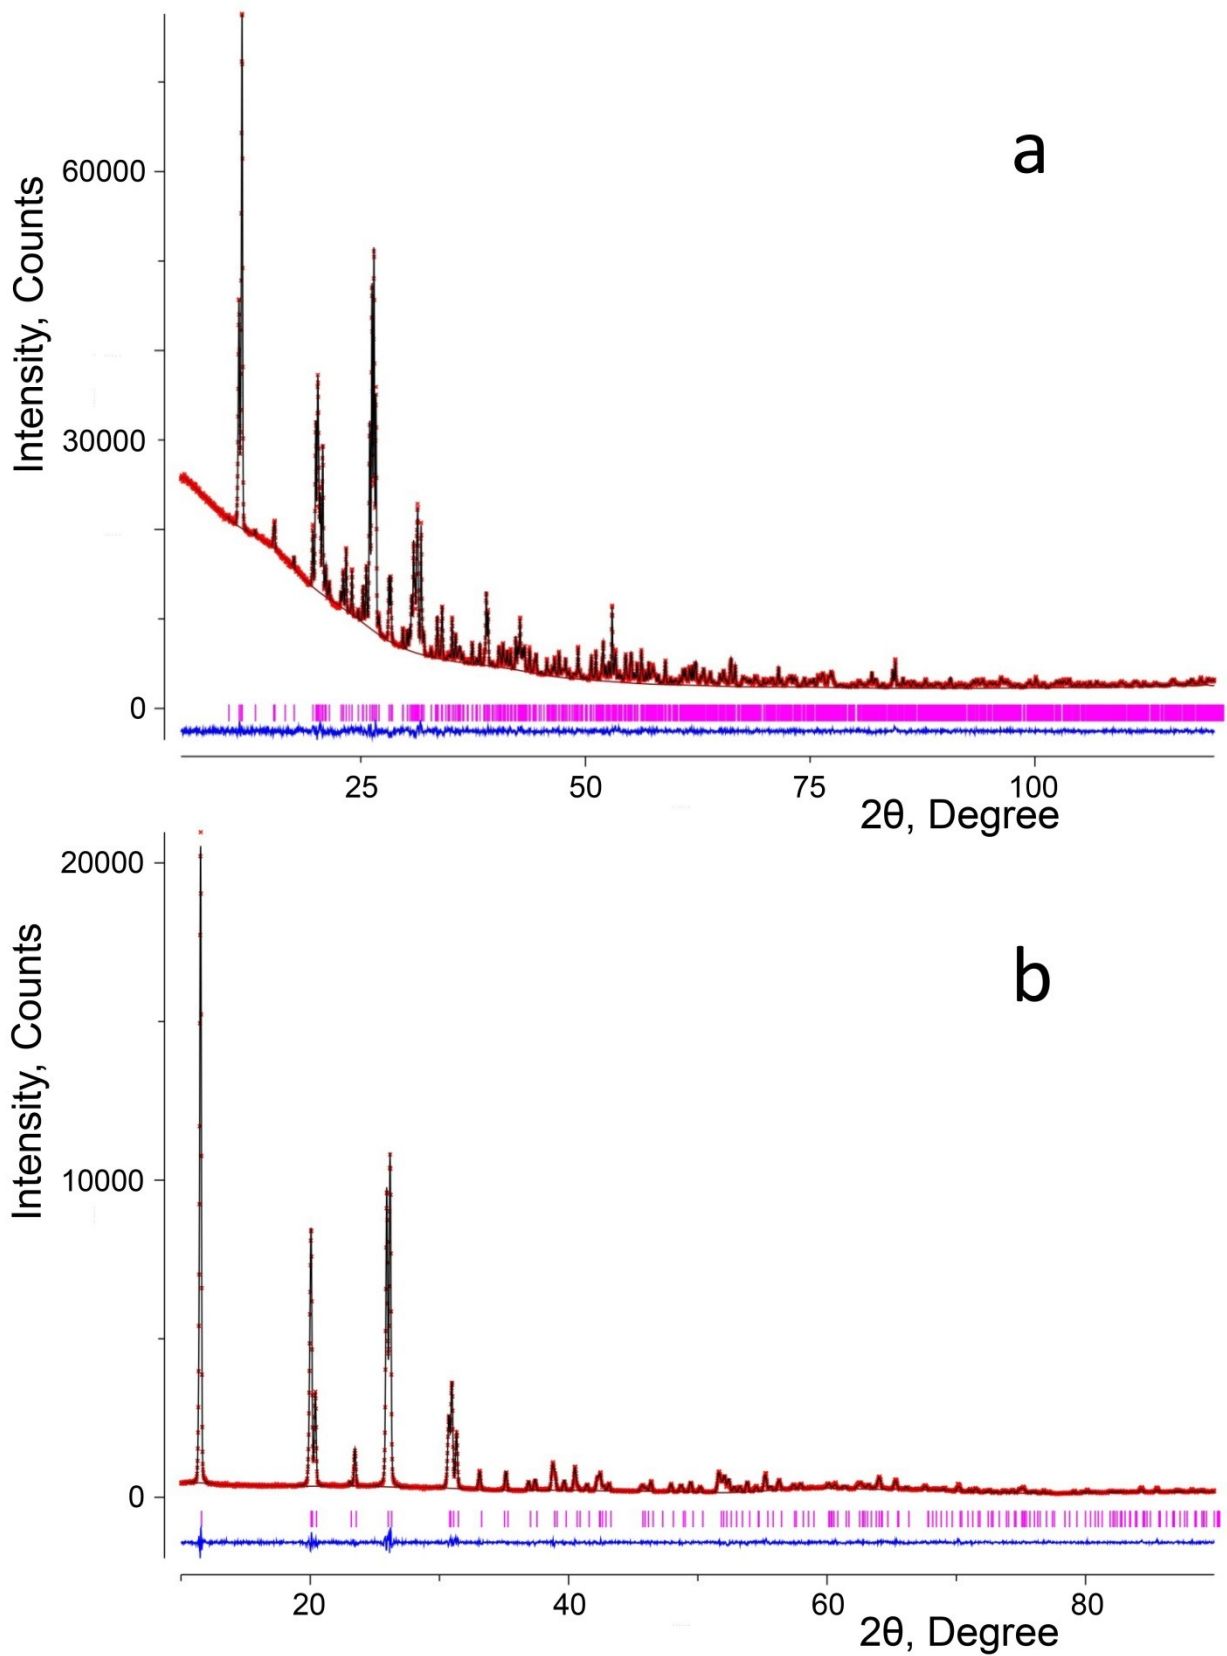

**Fig. 4** Experimental (crosses), calculated (solid line), and difference (bottom line) XRPD patterns of the low-temperature (a) and high-temperature modifications (b) of  $(\text{NH}_4)_3\text{Sc}(\text{SO}_4)_3$ . Series of tick marks correspond to the Bragg reflection.
